# Supplementary material for: CoMn2O4hierarchical microspheres with high catalytic activity towards p-nitrophenol reduction
Source: Royal Society of Chemistry journal article supplement (doi:10.1039/c4dt01686f), 2014-07-28
Supplement: c4dt01686f1.pdf [file c4dt01686f1.pdf]

Supplementary Information for:

**CoMn<sub>2</sub>O<sub>4</sub> hierarchical microspheres with high catalytic activity towards p-nitrophenol reduction**

**Xiaohui Shi,<sup>a</sup> Fangcai Zheng,<sup>a</sup> Nan Yan,<sup>a</sup> and Qianwang Chen<sup>a, b\*</sup>**

Figure S1. Mn2p XPS spectra of (a) C400, (b) C600 and (c) C700.

---

<sup>a</sup>Hefei National Laboratory for Physical Sciences at Microscale, Department of Materials Science & Engineering & Collaborative Innovation Center of Suzhou Nano Science and Technology, University of Science and Technology of China, Hefei, China. E-mail: [cqw@ustc.edu.cn](mailto:cqw@ustc.edu.cn)

<sup>b</sup>High Magnetic Field Laboratory, Hefei Institutes of Physical Science, Chinese Academy of Sciences, Hefei, China

E-mail: [cqw@ustc.edu.cn](mailto:cqw@ustc.edu.cn). Fax and Tel: +86 551 63603005.

Figure S2. The GC-MS results of (a) the reactant p-nitrophenol and (b) the p-aminophenol product after extracting the reaction mixture with ethyl acetate.

Figure S3. XRD patterns of C500 and the C500 after reaction(C500-A).

Figure S4. (a) SEM image of  $\text{CoMn}_2\text{O}_4$  with non-hierarchical shape. (b) XRD pattern of  $\text{CoMn}_2\text{O}_4$  with non-hierarchical shape. (c) UV-vis absorption spectra of p-nitrophenol reduction with  $\text{NaBH}_4$  catalyzed by  $\text{CoMn}_2\text{O}_4$  with non-hierarchical shape.

**Preparation of  $\text{CoMn}_2\text{O}_4$  with non-hierarchical shape:**  $\text{CoMn}_2\text{O}_4$  with non-hierarchical shape has been prepared by chemically co-deposition method: 80 mg  $\text{Mn}(\text{CH}_3\text{COO})_2 \cdot 4\text{H}_2\text{O}$  and 40 mg  $\text{Mn}(\text{CH}_3\text{COO})_2 \cdot 4\text{H}_2\text{O}$  added simultaneously to deionized water (50 ml),  $\text{K}_2\text{CO}_3$  (1 mmol/L) solution was used as precipitant, adjusted the PH to 9 at room temperature, after stewing 4 hours, The resulting precipitate was then centrifuged, washed with distilled water and ethanol and then dried under oven at 60 °C. The thermal decomposition of the pink precursor to  $\text{CoMn}_2\text{O}_4$  was performed at 400 °C, for 2 h in air in the oven with a heating rate of 10 °C  $\text{min}^{-1}$ .

**Catalytic performance measurements  $\text{CoMn}_2\text{O}_4$  with non-hierarchical shape:**

The catalytic test was same as the catalytic process of  $\text{CoMn}_2\text{O}_4$  hierarchical microspheres, except that the catalyst was changed to  $\text{CoMn}_2\text{O}_4$  with non-hierarchical shape.
